# Supplementary material for: Evaluating ChatGPT Responses to Frequently Asked Questions on Total Knee Arthroplasty
Source: Research Square preprint supplement (doi:10.21203/rs.3.rs-7122725/v1), 2025-07-23
Supplement: Supplementary file 1 [file 0dd9c7f70b8c55337f46737d.docx]

Supplement Table 1

**PATIENT'S QUESTIONS**

1. What should I do to prepare for the operation?
2. What does the surgical consent form contain and when should I sign it?
3. What is the procedure like and what implants are used to put it in?
4. Will there be any pain after the operation?
5. How will I be able to have a bowel movement after the operation?
6. When will I be able to walk on the floor after the operation?
7. What is the cost of the operation and when do I have to pay for it?
8. How long will I be discharged from the hospital after the operation and when will I be fully recovered?
9. Will other illnesses such as high blood pressure, diabetes, uremia, or heart disease affect the operation?
10. What should I eat and drink after the operation, and should I take any supplements or other medication?
11. how much can medical insurance reimburse
12. when is the surgery?
13. which doctor operates
14. how long will you be able to do manual labor after the surgery?
15. the exact time of surgery
16. whether there is any abnormality in the examination result
17. Can I use a square pillow for my feet after surgery?
18. Can I sleep on a pillow after surgery?
19. Can the head of the bed be swung up after surgery?
20. Can I recover as if I had not had the surgery?
21. which doctor did the operation?
22. Can I take more anti-inflammatory medicine after surgery?
23. Can I move my feet after surgery?
24. Do you need to call a babysitter?
25. can you do manual labor after surgery?
26. is there a double room?
27. will the doctor prescribe a blood tonic for anemia?
28. do you need albumin after surgery?
29. can you use cash?
30. can you take amino acids if you don't have a good appetite?
31. can other insurance be used?
32. can you operate on a swollen foot?
33. What is the surgeon's surgical technique?
34. how far will you recover after surgery?
35. how to sleep with a companion and whether there are blankets for rent
36. whether there is any medicine for toothache
37. can I take sleeping pills if I have trouble sleeping?
38. will the numbness of the feet after the operation be cured?
39. can I use commercial insurance at the same time?
40. what kind of anesthesia should I have?
41. Can I eat on the day of the operation?
42. Can I have surgery after having a pacemaker?
43. Why can't I wear underwear to the surgery?
44. What should I do if I don't eat on the day of surgery?
45. Can I be covered by other medical insurance?
46. Can I not drink any water on the day of surgery?
47. Can I take more painkillers after surgery?
48. What time does the doctor come to work?
49. Is there no pain in my feet after the operation?
50. when will you apply for medical insurance?
51. how long will you stay in the hospital?
52. How will deep vein thrombosis affect the operation?
