# Supplementary material for: Evaluating ChatGPT Responses to Frequently Asked Questions on Total Knee Arthroplasty
Source: Research Square preprint supplement (doi:10.21203/rs.3.rs-7122725/v1), 2025-07-23
Supplement: Supplementary file 2 [file 52e223e092085aa4f895898f.docx]

Supplement table 2

**CHATGPT'S ANSWER**

# **What should I do to prepare for the operation?**

Before joint replacement surgery, there are some important preparations that need to be made to ensure a smooth operation and a successful post-operative recovery. The following are some of the common pre-surgical preparation measures:

1. Pre-operative evaluation: The surgeon will perform a thorough physical examination and evaluation to ensure that the patient's overall health is suitable for surgery. This may include tests such as blood tests, EKGs, and X-rays.

2. Medical history and medication list: The patient should provide the doctor with a detailed medical history, including past surgeries and medication use. In particular, it is important to note whether the patient has had any allergic or adverse reactions to certain medications.

3. Discontinuation of anticoagulant medications: If the patient is taking anticoagulant medications (e.g., aspirin, warfarin, etc.), the doctor may instruct the patient to stop taking them some time prior to the procedure in order to minimize the risk of bleeding during the procedure.

4. Health adjustment: If the patient has other chronic diseases (e.g. hypertension, diabetes, etc.), the doctor may adjust the relevant medications and treatments before the surgery to ensure health management during and after the surgery.

5. Fasting and abstinence from food: Patients are usually required to abstain from food the night before surgery. The doctor will advise the duration of fasting according to the surgery schedule and the patient's specific situation.

6. Preparing family members or caregivers: As recovery and rehabilitation may take some time after surgery, patients usually need to prepare family members or caregivers for support and assistance.

7. Surgery communication: The surgeon will communicate with the patient in detail about the purpose, procedure, risks and expected results of the surgery to ensure that the patient understands and agrees to the surgery.

8. Pre-surgical gymnastics: The doctor or physiotherapist may teach the patient specific gymnastics or exercises to strengthen the muscles around the operated joints and to facilitate recovery after the surgery.

Please note that the above preparations are general recommendations and specific pre-surgical preparations may vary depending on the individual patient and the type of surgery. The final pre-surgical preparation will be developed by the surgeon based on the patient's condition.

# **What does the surgical consent form contain and when should I sign it?**

A surgical consent form is a document signed by the patient or his/her legal guardian prior to surgery to confirm that the patient fully understands the nature, purpose, risks, and expected results of the procedure and voluntarily agrees to undergo the procedure. The content of the surgical consent form may vary depending on hospital and state regulations, but should usually contain the following elements:

1. a description of the procedure: the surgical consent form will contain a brief description of the procedure to be performed, including the name and type of surgery, the joints or organs involved, etc. The consent form will also contain a description of the procedure to be performed, including the name and type of surgery.

2. Purpose: the surgical consent form will spell out the purpose of the surgery, i.e., the surgery will be performed to treat a specific disease or condition.

3. Risks: The surgical consent form will list the possible risks and complications of the surgery, including but not limited to infection, bleeding, thrombosis, reaction to anesthesia, etc. The surgeon will explain these risks to the patient. The surgeon will explain the likelihood and severity of these risks to the patient.

4. Benefits and Expected Outcomes: The surgical consent form will describe the expected outcomes and potential therapeutic benefits of the surgery so that the patient can understand the positive impact of the surgery on his or her health.

5. alternatives: where possible, the surgical consent form may mention alternatives to surgery and the possible consequences of not having surgery.

6. consent for anesthesia: if anesthesia is required for the surgery, the surgical consent form will include the patient's consent for the anesthesia process.

7. Voluntary consent: The surgical consent form will emphasize that the surgery is a voluntary decision by the patient and that the patient has been fully informed of the risks and benefits of the surgery.

8. Legal Responsibilities: The surgical consent form will state the responsibilities and obligations of the physician and the healthcare provider for the performance of the surgery.

The surgical consent form is usually provided to the patient a day or more before the surgery so that they have enough time to read and understand its contents. After confirming that the patient has fully understood the surgery, the patient or their legal guardian will sign the consent form prior to the surgery. Signing the consent form is a necessary prerequisite for the surgery to proceed to ensure that the medical team and the patient have a clear understanding of the purpose and risks of the surgery prior to the procedure.

# **What is the procedure like and what** **implants are used to put it in?**

The procedure can vary depending on the type of joint replacement surgery. Typically, joint replacement surgery is an open procedure that requires the surgeon to make an incision in the surgical area and use specific tools and materials to replace the joint. Below are the general steps and materials used in a typical joint replacement surgery:

1. Anesthesia: Before the surgery begins, the patient receives anesthesia to ensure that there is no pain for the patient during the procedure. Generally, general or local anesthesia is used for joint replacement surgery.

2. Incision: The surgeon will make an appropriately sized incision near the patient's joint in order to access the affected joint.

3. Removal of damaged tissue: The surgeon will remove the damaged part of the joint, including damaged cartilage and bone.

4. Implantation of an artificial joint: The doctor will replace the removed part of the joint with an artificial joint. Artificial joints are usually made of metal, ceramic, or plastic. For example, in knee replacement surgery, artificial knee joints made of metal and plastic materials are commonly used.

5. Firm fixation: The surgeon will use bone cement or other fixation materials to firmly anchor the artificial joint in the correct position.

6. Joint adjustment and testing: The doctor will adjust the position of the artificial joint to ensure that its range of motion and function in the joint is consistent with normal physiologic conditions. The surgeon will also test the stability and motion of the joint.

7. Incision closure: At the end of the procedure, the surgeon will close the incision and apply any necessary dressings.

Materials used during the procedure include but are not limited to:

- Artificial joints: Depending on the type of surgery, this may be an artificial joint made of metal, ceramic, plastic or composite material.

- Bone cement: special cement used to secure the artificial joint to the bone.

- Sutures and bandaging materials: used to close surgical incisions and perform bandaging treatments.

- Surgical tools: Surgical tools, including blades, scissors, pliers, drills, etc., used to perform surgical steps.

It is important to emphasize that each joint replacement surgery has a specific procedure and materials used, and that each doctor and medical team may have their own operational preferences. The specific details of the procedure and the choice of materials will be determined by the patient's condition and the doctor's judgment.

# **Will there be any pain after the operation?**

Postoperative pain is common with joint replacement surgery, but its intensity and duration can vary depending on the individual patient, the type of surgery, and post-operative rehabilitation measures. Typically, patients may experience some degree of pain and discomfort in the first few days to weeks after surgery.

The main reason for this is the removal of damaged tissue and the implantation of an artificial joint during surgery, which can cause trauma to the surgical area. In addition, the healing and recovery of the tissues after surgery may also cause some degree of discomfort.

In order to alleviate post-operative pain, the doctor and medical team will take the following measures:

1. Anesthesia management: During surgery, the anesthesiologist will do his/her best to reduce the patient's pain. After the operation, the doctor will equip the patient with appropriate analgesic medication according to his/her pain level.

2. Rehabilitation care: After the surgery, the medical team will help the patient to start moving around gradually and teach rehabilitation exercises and physical therapy to promote joint recovery and reduce pain.

3. Ice: Application of ice packs can reduce swelling and pain in the surgical area.

4. Incision care: Keeping the surgical incision clean and dry will help prevent infection and minimize post-operative complications.

5. Follow medical advice: Patients should follow the advice of their doctor and healthcare team for rehabilitation care and avoid excessive force and inappropriate activities that may aggravate pain and damage the surgical area.

Although postoperative pain is a normal physiologic response, patients who experience severe pain, persistent fever, significant swelling, or unusual symptoms should contact their doctor for prompt management of possible complications or infection. Postoperative pain is a normal part of the recovery process, but with a reasonable rehabilitation program and guidance from the doctor, most patients are able to gradually reduce their pain and return to normal life and mobility.

# **How will I be able to have a bowel movement after the operation?**

How to address urinary and bowel issues after surgery will vary depending on the type of surgery, the location of the surgery, and the individual patient. The following are some common ways to address bowel problems:

1. Bedtime urinal bottles: For some patients whose surgery does not involve the pelvis or lower extremities, urinal bottles may be used in bed to address urination issues. The healthcare provider will assist the patient in using the bottle and changing it when needed.

2. Urinary catheter: A urinary catheter may be temporarily placed in patients who require longer periods of bed rest, especially for general anesthesia procedures. The catheter will drain the urine without the patient having to go to the bedside or toilet.

3. Bedside or commode: For patients who can get out of bed earlier, the healthcare provider will assist the patient to use the bedside or commode. After gradually regaining the ability to walk after surgery, the patient can go to the restroom for urination and defecation.

4. Resumption of walking: Under the guidance of doctors and rehabilitation specialists, patients will gradually begin to walk. Walking moderately will help to promote the recovery of the digestive system and help to pass urine.

5. Pay attention to water intake: After surgery, patients usually need to follow the doctor's dietary advice, especially the amount of water to drink. Drinking the right amount of water as directed by your doctor will help keep the urine out.

Importantly, resolving bowel problems after surgery needs to be individualized to the patient. Healthcare professionals will provide appropriate assistance and guidance to ensure that patients are able to safely resolve bowel and bladder problems after surgery. Patients should communicate with their healthcare provider if they experience any difficulties or discomfort so that the plan of care can be adjusted in a timely manner.

# **When will I be able to walk on the floor after the operation?**

The time it takes to resume walking off the floor varies depending on the type of surgery, individual patient differences and the progress of rehabilitation. In general, after joint replacement surgery, patients may need to remain on bed rest on the day of surgery or the first day after surgery to allow the surgical area to rest and heal properly. However, the following is a general timeline for walking recovery after joint replacement surgery:

1. Day 1: On the first day after surgery, patients usually need to stay on bed rest to keep the surgical area stable and avoid excessive activity.

2. Day 2: Under the supervision of the doctor and rehabilitation specialist, the patient may begin to try simple leg movements in bed and may stand or walk a short distance with bedside aids.

3. Day 3 to 5: Depending on the patient's recovery, some patients may begin to try walking on the floor on days 3 to 5, usually with the use of aids such as crutches or a walking frame, accompanied by a healthcare professional.

4. First week: During the first week after surgery, patients usually continue with rehabilitation exercises and physical therapy to strengthen the muscles around the operated joints and improve walking stability.

5. Subsequent weeks: As rehabilitation progresses, the patient will gradually become less dependent on assistive devices and regain the ability to walk. However, it is important to note that the time to recovery varies from individual to individual.

It is important that walking recovery after surgery should be under the guidance of a physician and rehabilitation specialist. They will develop a personalized rehabilitation plan based on the patient's surgery and recovery progress. During the recovery process, patients should follow their doctor's advice to avoid excessive activity and weight bearing that may interfere with the recovery of the surgical area. Gradually increasing the time and distance of activity and walking will help restore physical function and allow the patient to gradually return to a normal level of life and activity.

# **What is the cost of the operation and when do I have to pay for it?**

The components of the cost of surgery and the timing of payment will vary depending on the hospital and type of surgery. The cost of surgery usually consists of several components, which may include the following:

1. surgical fee: this refers to the cost of the surgical procedure itself, including the cost of the work of the surgeon and the medical team, the use of the operating room and equipment, and so on.

2. anesthesia costs: if anesthesia is required for the procedure, the anesthesia costs will include the costs for the drugs used for anesthesia and the anesthesiologist.

3. material costs: this includes the cost of medical materials and artificial instruments used during the surgery.

4. hospitalization costs: if the surgery requires hospitalization, the hospitalization costs will include the cost of care, medication and other medical services during the hospital stay.

5. Rehabilitation and Nursing Care: This includes the cost of rehabilitation and nursing care services after the surgery, such as the cost of a rehabilitator and the use of rehabilitation equipment.

6. Examinations and tests: A series of examinations and tests may be required before and after the operation, and these costs are also counted towards the cost of the operation.

Payment for surgery is usually made before or on the day of surgery. In some countries or regions, hospitals may require the patient to pay a portion of the cost of the surgery in advance as a pre-payment, and the balance can be billed after the surgery. For some emergency surgeries, patients may receive a bill from the hospital within a certain period of time after the surgery and then need to make the required payment.

The exact process and timing of payment will vary depending on the hospital's policy and the patient's specific situation. Prior to the procedure, patients usually speak with the hospital's finance department or medical services department to understand the components of the procedure's cost and how to pay for it, and to prepare accordingly. Also, if the patient has health insurance, he or she will need to understand the policies and processes related to health insurance reimbursement.

# **How long will I be discharged from hospital after the operation and when will I be fully recovered?**

Postoperative discharge and full recovery times vary depending on the type of surgery, individual patient differences, and the progress of postoperative recovery. Below are some common scenarios and general timelines:

1. Time to discharge: Time to discharge will vary depending on the type of surgery and the patient's recovery. For some simpler joint replacement surgeries, patients may be discharged within 2 to 5 days after surgery. For more complex surgeries or if the patient's recovery is slower, the discharge time may be longer.

2. Time to full recovery: The time to full recovery also varies depending on the type of surgery and the individual patient. In the weeks to months following surgery, patients may gradually return to their daily activities and gait. However, for full recovery, it may take several months to a year, depending on factors such as the complexity of the type of surgery, the patient's progress in recovery, following a rehabilitation program, and the doctor's recommendations.

3. Progression of rehabilitation: Rehabilitation after surgery is a gradual process. In the beginning, the patient will walk with aids such as crutches or a walking frame. Over time, the patient will gradually increase the walking time and distance, and gradually begin to perform daily activities. During the rehabilitation period, the patient may also need to undergo physical therapy and rehabilitation exercises to enhance muscle strength and joint stability.

4. Doctor's guidance: Patients should closely follow the advice and guidance of their doctors and rehabilitation specialists during rehabilitation. Regular follow-ups and rehabilitation assessments will help track progress and make timely adjustments to the rehabilitation program.

Importantly, each patient's recovery process is unique and requires an individualized treatment and rehabilitation plan. The doctor will develop an appropriate rehabilitation program based on the patient's surgery and recovery progress, and will provide support and guidance to the patient during the recovery period. It is important for the patient to actively participate in the rehabilitation process and follow the doctor's advice to gradually increase the level of activity to promote early recovery.

# **Will other illnesses such as high blood pressure, diabetes, uremia or heart disease affect the operation?**

Other medical conditions such as high blood pressure, diabetes, uremia, and heart disease may affect the safety of the surgery and post-operative recovery to some extent. These chronic diseases may increase the risk of surgery and require adequate assessment and preparation by the surgeon prior to surgery.

1. Hypertension: For patients with high blood pressure, special attention needs to be paid to the control of their blood pressure during surgery, as high blood pressure may increase the burden on the heart and blood vessels during surgery. Patients may need to have their medication appropriately adjusted prior to surgery to ensure that their blood pressure remains within a safe range during surgery.

2. Diabetes mellitus: Patients with diabetes mellitus need to have their blood glucose levels closely controlled prior to surgery, as high blood glucose may interfere with wound healing and post-surgical recovery. Doctors may advise patients to temporarily adjust the dosage of oral medication or insulin and monitor blood glucose levels before surgery.

3. Uremia: Patients with uremia, whose kidney function has been impaired, may need to pay special attention to the use of drugs and drug metabolism during surgery. The surgeon may need to adjust the medication prior to surgery and ensure that the impact on kidney function is minimized during surgery.

4. Heart disease: For patients with heart disease, a cardiac evaluation is required prior to surgery to ensure that the patient's heart condition is able to withstand the burden of surgery. Tests such as electrocardiogram and cardiac ultrasound may be required, and depending on the results, appropriate measures such as adjusting medication or deciding on the timeliness of the surgery will be taken.

For patients with these chronic conditions, pre-surgical evaluation is very important to ensure the safety and success of the procedure. The surgeon will consider the patient's condition, the type of surgery and the patient's individual characteristics to develop a personalized surgical plan. After surgery, patients may need to undergo closer rehabilitation care under the guidance of the doctor and rehabilitation team to ensure a smooth recovery.

# **What should I eat and drink after the operation, and should I take any supplements or other medication?**

Diet after surgery is very important because a proper diet helps promote healing, restore strength and facilitate recovery. Diet after surgery should follow the advice of your doctor and nutritional specialist, depending on the type of surgery and the individual patient. Here are some general dietary recommendations:

1. High protein diet: Moderate increase in protein intake is needed after surgery to promote wound healing and muscle repair. High-quality protein sources include lean meats, fish, poultry, beans, dairy products and nuts.

2. Multivitamins and minerals: Diets should include an abundance of vegetables and fruits to obtain a wide range of vitamins and minerals that contribute to immune function and overall healing.

3. Avoid high-fat and high-sugar foods: Excessive high-fat and high-sugar foods should be avoided after surgery to avoid weight gain and adverse effects on blood sugar levels.

4. Adequate hydration: Maintaining adequate water intake helps prevent dehydration and promotes recovery of body functions.

Regarding the intake of supplements and other medications, it is best to consult your doctor for advice before surgery. In general, post-surgery patients may need to take supplements of specific vitamins, minerals or other nutrients to meet the body's needs. However, not all supplements are suitable for all patients, so it is best to use them under the guidance of a medical professional.

For other medications, patients should continue to use their existing medications as directed by their doctor, while informing them about the medications they are taking. Some medications may interfere with blood clotting for surgery or affect the effectiveness of anesthesia, so the doctor needs to be informed of all medications used, both prescription and over-the-counter, prior to surgery.

In conclusion, after surgery, dietary choices and medications need to be personalized to the individual. Patients should follow the advice of their doctors and nutrition experts to maintain a healthy diet and lifestyle to promote early recovery.
