# Supplementary material for: Evaluating ChatGPT Responses to Frequently Asked Questions on Total Knee Arthroplasty
Source: Research Square preprint supplement (doi:10.21203/rs.3.rs-7122725/v1), 2025-07-23
Supplement: Supplementary file 3 [file b861385e98659287a3930aee.docx]

Supplement table 3

**CHATGPT'S ANSWER**

# **What should I do to prepare for the operation?**

The following points should be kept in mind when eating after surgery:

Fluid intake: It may be necessary to limit the amount of fluids consumed in the early stages after surgery, especially if you are going through a period of recovery from anesthesia or bowel function. Your doctor or nurse will provide specific dietary advice.

Easily digestible foods: Choose foods that are easy to digest, such as rice, noodles, cooked vegetables, chicken or fish to minimize the burden on your digestive system.

High-fiber foods: Your diet should contain enough fiber to help prevent constipation. You can opt for fiber-rich foods such as whole grain breads, fruits, vegetables and beans.

PROTEIN INTAKE: Protein helps in wound healing and muscle repair, so make sure you consume enough protein such as chicken, fish, beans, nuts and dairy products.

Avoid irritating foods: Avoid irritating foods such as spicy foods, coffee, alcohol and carbonated beverages to minimize irritation to the digestive system.

Regarding the intake of supplements and other medications, you should follow your doctor's or nurse's advice after surgery. Generally, you may need to take antibiotics or painkillers after surgery to prevent infection and reduce pain. Unless otherwise advised by your doctor, it is best to avoid using supplements or other medications immediately after surgery as this may interfere with the absorption of the medication or increase the risk of post-operative complications.

Overall, the postoperative diet should consist of light-salt, low-fat, easy-to-digest and nutrient-rich foods. Follow your doctor's or nurse's instructions and adjust your diet and medication intake according to your specific postoperative condition.

# **What does the surgical consent form contain and when should I sign it?**

The surgical consent form is a very important document that contains a written record of your agreement to undergo surgery. It usually includes the following:

1. the nature of the surgery: describes the type of surgery that will be performed, e.g., knee replacement.

2. Purpose of the surgery: Explains why the surgery is necessary and the expected results of the surgery, e.g., pain relief, improved joint function, etc. 3.

3. Risks of Surgery: Include possible risks and complications of the procedure, e.g., infection, bleeding, thrombosis.

4. Alternatives to surgery: describes possible alternative treatment options and their advantages and disadvantages if surgery is not performed.

5. Post-operative rehabilitation: Provides information about the post-operative rehabilitation process, including how long it will take to recover, problems that may arise during recovery, and what to do about them.

6. Right to Consent: Acknowledges that you have fully understood the purpose, risks, and alternative options of the surgery and have the right to make your own decisions.

The surgical consent form is usually explained clearly to you by your doctor or healthcare team before the surgery and you are given enough time to read and understand it. Once you fully understand and agree to undergo the surgery and have no further questions or concerns, you can sign the surgical consent form. It is usually common practice to sign the surgical consent form on the day of surgery or a few days before surgery.

# **What is the procedure like and what** **implants are used to put it in?**

Knee replacement surgery is a common surgical procedure used to treat severe knee pain and dysfunction. Here is the general procedure of the surgery:

1. Anesthesia: Before the surgery begins, you will receive either general or local anesthesia, depending on your and your doctor's specific situation and preference.

2. Surgical incision: The surgeon will make an incision near the knee joint. The size of this incision is usually 10 to 30 centimeters, depending on the specifics of the procedure. 3.

3. Removal of damaged tissue: The surgeon will remove the damaged articular cartilage and bone and prepare it for the implantation of the prosthesis.

4. Implantation of prosthesis: The surgeon will implant an artificial knee prosthesis, including metal, plastic and ceramic components, to replace the damaged joint tissue.

5. Closing the incision: At the end of the surgery, the surgeon will close the incision with sutures and may place a drain to remove blood or other fluids after the surgery.

Materials used in knee replacement surgery include:

1. artificial joint prostheses: These include metal alloys, plastic and ceramic components that are used to replace damaged joint tissue.

2. Suture materials: Sutures or staples used to close the incision.

3. drains: In some cases, the surgeon may place drains at the end of the procedure to remove blood or other fluids after surgery.

These materials are carefully designed and selected to mimic natural joint structure and function to the greatest extent possible, and are durable and biocompatible to provide stable joint support and long-lasting pain relief.

# **Will there be any pain after the operation?**

After knee replacement surgery, it is a normal reaction to the degree of pain you may experience after surgery. Post-surgical pain is usually caused by trauma to the surgical incisions, joint muscles, and tissues, and diminishes over the days or weeks following surgery.

Your doctor and care team will take a number of steps to manage your post-operative pain to ensure your comfort and recovery process. These measures may include:

1. Medication: Includes painkillers and anti-inflammatory medications to help reduce pain and minimize inflammation.

2. Physical therapy: Includes physical therapy and rehabilitation exercises to help restore joint function and build muscle strength.

3. Ice: Ice relieves pain and swelling after surgery and provides comfort. 4.

4. Reasonable activity: Proper activity can help prevent joint stiffness and promote recovery, but it should be done under the supervision of a doctor or physical therapist.

5. Rest and leg lifts: Rest and leg lifts can help reduce pain by taking pressure and load off the joints.

Although postoperative pain is normal, if you experience excessive or persistent pain or if it is accompanied by other unusual symptoms, such as persistent swelling, warmth, or redness, you should inform your doctor immediately so that possible complications can be addressed promptly.

# **How will I be able to have a bowel movement after the operation?**

Urination and defecation is an area that requires special attention after knee replacement surgery. The pain and restriction of movement after surgery may have an impact on continence, but there are a number of ways to help you with this:

1. Bedside urinals or potties: After surgery, it may be difficult for you to stand up to go to the bathroom for a while, so the hospital will provide bedside urinals or potties to make it easier for you to urinate and defecate in bed.

2. Assistance and supervision: You may need assistance and supervision from others to help you reach the bathroom or use the bedside urinal for a period of time after surgery.

3. Correct posture: If you are able to stand to reach the bathroom, make sure you use the correct posture to avoid excessive bending or twisting of the knee to reduce discomfort and pain.

4. Timely urination: Avoid holding your urine and try to urinate as frequently as possible to reduce the pressure of urine in the bladder and to minimize the amount of time the urine is retained.

5. Physical Therapy: Your Physical Therapist may be able to teach you appropriate movements and techniques to help you urinate and defecate more easily while ensuring that it does not adversely affect your post-operative recovery.

It is very important to address continence issues promptly during your recovery as excessive holding or retention of urine may increase the risk of infection as well as increase the level of pain and discomfort after surgery. If you have any problems or difficulties with urination or defecation after surgery, please seek help and advice from your healthcare team immediately. They will provide appropriate support and guidance to ensure your comfort and safety.

# **When will I be able to walk on the floor after the operation?**

The amount of time you can walk off the floor after surgery varies depending on your individual recovery, but the following general guidelines are usually followed:

1. Immediately After Surgery: During the initial period after surgery, you may feel weak or groggy and will need to rest and recover. At this point, your healthcare provider will help you with bedside activities and basic joint movements.

2. The first day after surgery: Generally, on the first day after surgery, you may be encouraged to try to stand and walk for a few steps, but this may be done with the help of a walker, crutches, or other assistive device and under the supervision of your healthcare provider.

3. A few days to a week after surgery: As you recover, your muscles and joints will gradually regain strength and stability. During this time, you may gradually increase the amount of time and distance you walk, but you will still need to use assistive devices and be careful not to overload yourself.

4. One to two weeks after surgery: Most people are able to start walking at home within one to two weeks after surgery, but may still require the use of assistive devices and will need to follow the rehabilitation instructions of their doctor or physiotherapist.

5. Weeks to months after surgery: In the early stages of rehabilitation, you may experience some discomfort and instability, but your gait and ability to walk will gradually improve over time as your rehabilitation progresses. In the weeks to months following surgery, you may become less dependent on assistive devices and gradually return to your normal walking ability.

Overall, the process of walking recovery after surgery is a gradual one, and the most appropriate time and manner should be determined based on your individual recovery and your doctor's recommendations. It is important to be patient and cautious during the rehabilitation process and to follow the instructions of your medical team.

# **What is the cost of the operation and when do I have to pay for it?**

The components of the cost of surgery vary depending on the type of surgery, the medical organization and the region, but usually include the following areas of cost:

1. Surgical costs: This refers to the fees charged by the doctor and surgical team for performing the surgery, including the cost of operating room use and medical equipment.

2. Anesthesia: This refers to the cost of providing anesthesia services, including the cost of the anesthesiologist and the cost of anesthesia medications.

3. bed costs: If hospitalization is required, inpatient bed costs may be incurred, including the cost of the room, nursing care, and meals.

4. Examinations and Tests: This includes the cost of various examinations and tests such as blood tests, x-rays, electrocardiograms, etc., which are required for pre-operative evaluation and post-operative monitoring.

5. medication and material costs: this includes the costs of medication, dressings, surgical instruments, etc. used during the operation.

6. Rehabilitation and rehabilitation equipment costs: Additional costs may be incurred if rehabilitation treatment or the use of rehabilitation equipment is required.

Payment is usually due before or on the day of surgery. The healthcare provider will ask you to pay for the surgery in advance or sign a commitment to pay. In some cases, payment in installments or through health insurance can be negotiated with the medical facility. It is best to consult the finance department of the medical institution for details of the fees and payment arrangements before the surgery.

# **How long will I be discharged from hospital after the operation and when will I be fully recovered?**

The components of the cost of surgery vary depending on the type of surgery, the medical organization and the region, but usually include the following areas of cost:

1. Surgical costs: This refers to the fees charged by the doctor and surgical team for performing the surgery, including the cost of operating room use and medical equipment.

2. Anesthesia: This refers to the cost of providing anesthesia services, including the cost of the anesthesiologist and the cost of anesthesia medications.

3. bed costs: If hospitalization is required, inpatient bed costs may be incurred, including the cost of the room, nursing care, and meals.

4. Examinations and Tests: This includes the cost of various examinations and tests such as blood tests, x-rays, electrocardiograms, etc., which are required for pre-operative evaluation and post-operative monitoring.

5. medication and material costs: this includes the costs of medication, dressings, surgical instruments, etc. used during the operation.

6. Rehabilitation and rehabilitation equipment costs: Additional costs may be incurred if rehabilitation treatment or the use of rehabilitation equipment is required.

Payment is usually due before or on the day of surgery. The healthcare provider will ask you to pay for the surgery in advance or sign a commitment to pay. In some cases, payment in installments or through health insurance can be negotiated with the medical facility. It is best to consult the finance department of the medical institution for details of the fees and payment arrangements before the surgery.

# **Will other illnesses such as high blood pressure, diabetes, uremia or heart disease affect the operation?**

High blood pressure, diabetes, uremia, heart disease, and other medical conditions may have an effect on the surgery as they may increase the risk of surgery and anesthesia, and interfere with a smooth post-operative recovery. Here are the possible effects of these diseases on surgery:

1. High blood pressure: High blood pressure may increase the risk of bleeding and cardiovascular complications during surgery. Prior to surgery, your doctor may adjust your high blood pressure medication to ensure that your blood pressure is controlled within safe limits during surgery.

2. Diabetes: Diabetes may increase the risk of infection and poor wound healing. Prior to surgery, your doctor will focus on blood sugar control and may adjust diabetes medications or insulin doses.

3. Uremia: Uremia may affect the metabolism of anesthetic drugs and medications, increasing the risk of surgery. Before surgery, your doctor will evaluate kidney function and may need to adjust drug dosages.

4. Heart disease: Heart disease may increase the risk of cardiovascular events during surgery, such as heart attack or arrhythmia. Prior to surgery, the physician may order tests such as an electrocardiogram and cardiac ultrasound, and may need to further evaluate and manage cardiovascular disease.

In patients with these conditions, the physician will usually perform a thorough evaluation and take appropriate measures to minimize the risk of surgery. This may include adjusting medications, optimizing disease control, performing additional exams and tests, and working with other specialized medical teams.

It is important to have a detailed discussion with your doctor before deciding to undergo surgery and to fully understand how your disease may affect the procedure as well as the possible risks and benefits.

# **What should I eat and drink after the operation, and should I take any supplements or other medication?**

You should pay attention to the following points in your diet after surgery:

1. Fluid intake: It may be necessary to limit the amount of fluids consumed in the early stages after surgery, especially if you are experiencing anesthesia or recovering from bowel function. Your doctor or nurse will provide specific dietary advice.

2. Easy-to-digest foods: Choose foods that are easy to digest, such as rice, noodles, cooked vegetables, chicken or fish to minimize the burden on your digestive system.

3. High-fiber foods: Your diet should contain enough fiber to help prevent constipation. You can choose fiber-rich foods such as whole grain bread, fruits, vegetables and beans.

4. Protein intake: Protein helps in wound healing and muscle repair, so make sure you get enough protein such as chicken, fish, beans, nuts and dairy products.

5. Avoidance of irritating foods: Avoid irritating foods such as spicy foods, coffee, alcohol and carbonated beverages to minimize irritation to the digestive system.

Regarding the intake of supplements and other medications, you should follow your doctor's or nurse's advice after surgery. Generally, you may need to take antibiotics or painkillers after surgery to prevent infection and reduce pain. Unless otherwise advised by your doctor, it is best to avoid using supplements or other medications immediately after surgery as this may interfere with the absorption of the medication or increase the risk of post-operative complications.

Overall, the postoperative diet should consist of light-salt, low-fat, easy-to-digest and nutrient-rich foods. Follow your doctor's or nurse's instructions and adjust your diet and medication intake according to your specific postoperative condition.
